# Supplementary material for: RyR2R420Q catecholaminergic polymorphic ventricular tachycardia mutation induces bradycardia by disturbing the coupled clock pacemaker mechanism
Source: JCI journal article supplement (doi:10.1172/jci.insight.91872), 2017-04-19
Supplement: sd1 [file 1]

## **SUPPLEMENTAL DATA**

**RyR<sub>2</sub><sup>R420Q</sup> Catecholaminergic Polymorphic Ventricular Tachycardia mutation induces  
bradycardia by disturbing the coupled clock pacemaker mechanism**

Yue Yi Wang<sup>1</sup>, Pietro Mesirca<sup>2</sup>, Elena Marqués-Sulé<sup>1,3</sup>, Alexandra Zahradnikova Jr<sup>1\*</sup>, Olivier  
Villejoubert<sup>1</sup>, Pilar d'Ocon<sup>4</sup>, Cristina Ruiz<sup>5</sup>, Diana Domingo<sup>6</sup>, Esther Zorio<sup>6</sup>, Matteo E. Mangoni<sup>2</sup>,  
Jean-Pierre Benitah<sup>1</sup>, Ana María Gómez<sup>1</sup>

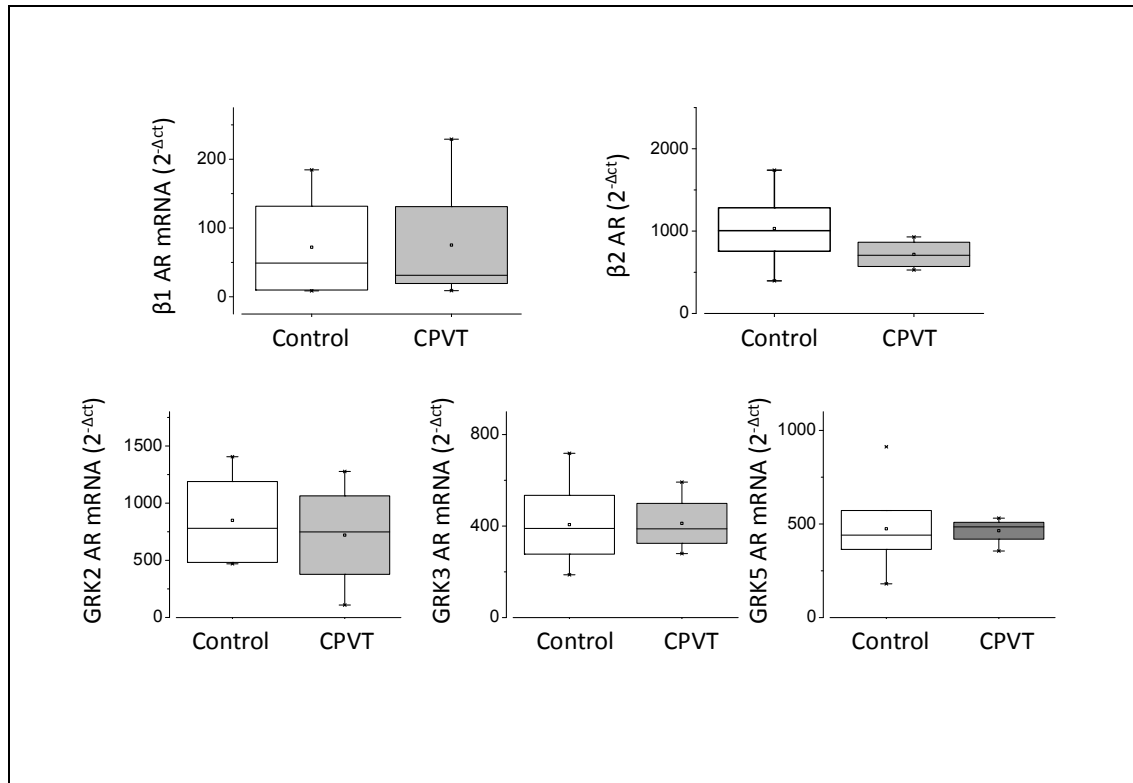

**Supp. Fig.1.  $\beta$  adrenergic receptors and  $\beta$  adrenergic receptor kinases expression are normal in RyR<sub>2</sub><sup>R420Q</sup> CPVT patients.** From left to right and from top to bottom, mRNA levels for  $\beta_1$  and  $\beta_2$  adrenergic receptors (ARs) and G protein receptor kinases (GRK) GRK2, GRK3 and GRK5 measured in the peripheral blood mononuclear cells obtained from healthy volunteers (white bars, N=8) or CPVT patients (gray bars, N=4). The Ct values obtained for each gene were referenced to *GAPDH* and converted into the linear form using the term  $2^{-\Delta Ct} \times 10000$  as a value directly proportional to the mRNA copy number. Data presented as box chart with 25-75% percentiles. Independent sample t-test was performed but no significant differences were found between groups ( $P > 0.05$ ).

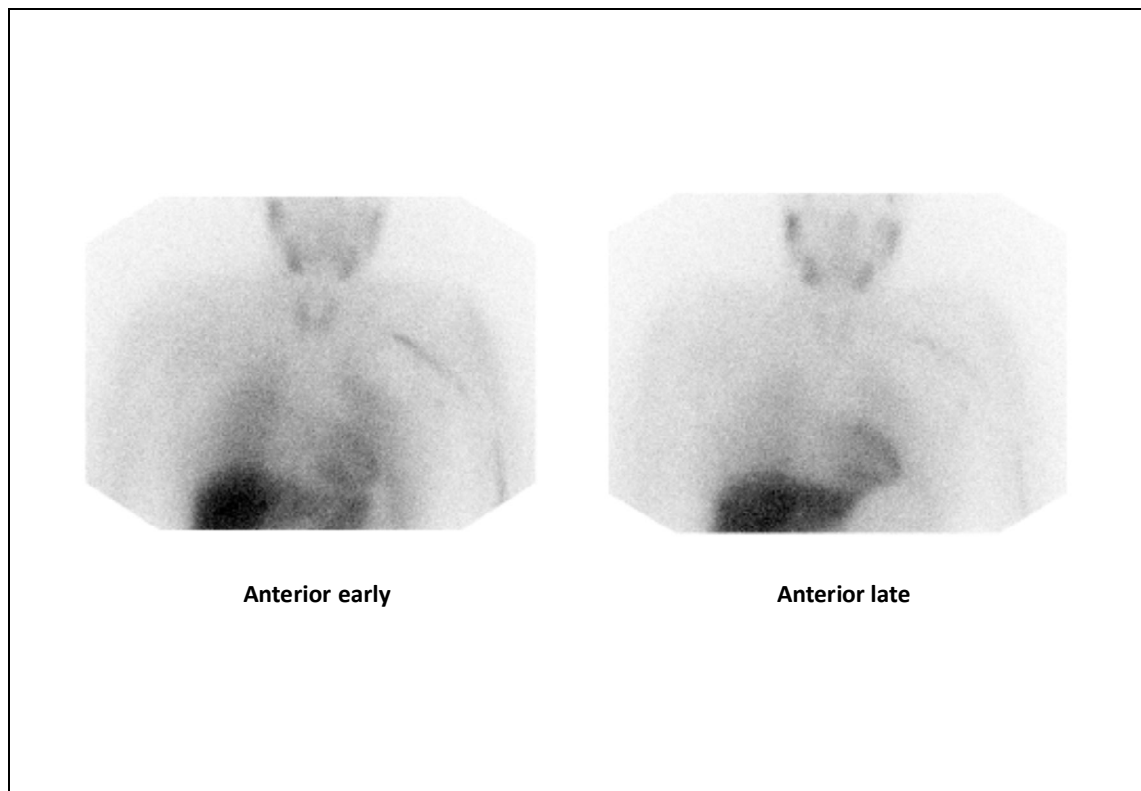

**Supp. Fig. 2. Representative planar images from the anterior projection of a CPVT patient carrier of the RyR<sub>2</sub><sup>R420Q</sup> mutation.** The H/M ratio (Heart/Mediastinum Count Ratio) and WR (washout rate) parameters are not altered. Anterior early H/M: 1.75, anterior late H/M: 1.7, WR: 20%

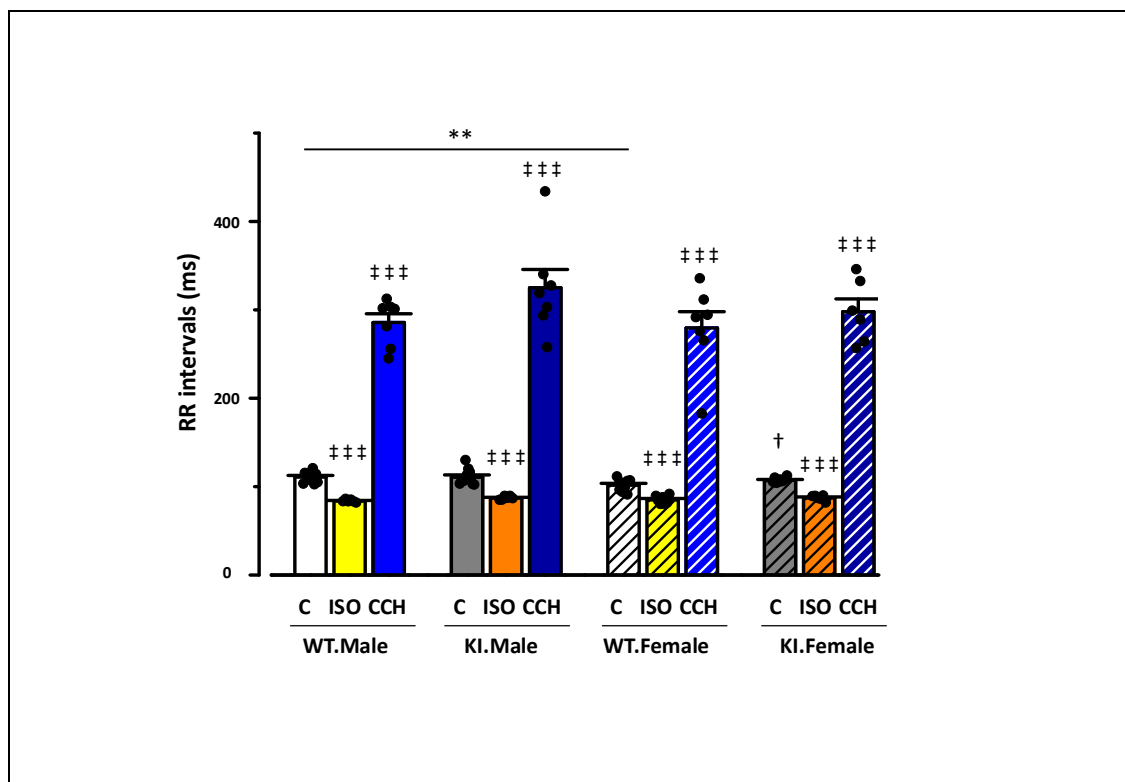

**Supp. Fig. 3. Absolute values of RR intervals in vivo in wild type (WT) and RyR<sub>2</sub><sup>R420Q</sup> (knock in, KI) mice.** RR interval in vivo before (C, white and grey for WT and KI respectively) and after 1mg/kg isoproterenol i.p. injection (ISO) (yellow and orange for WT and KI respectively) or 0.25mg/kg carbachol i.p. injection (CCH) (blue and navy blue for WT and KI respectively) challenge in WT and KI mice. Bars with diagonal stripes represent females. N values are the same as Figure 1. \*\**P* < 0.01 vs. WT male. †*P* < 0.05 vs. WT female, ††† *P* < 0.0001 vs. basal condition.

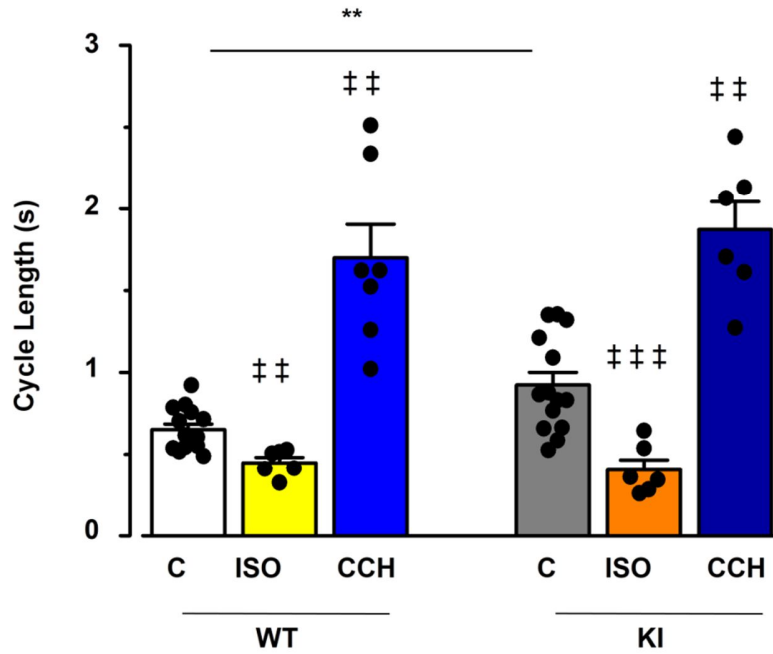

**Supp. Fig.4. Absolute value of cycle length in intact sinoatrial node before and after isoproterenol (ISO) or carbachol (CCH) challenge.** White and grey represent basal wild type (WT) and knock-in (KI) respectively, and yellow and orange WT and KI after ISO respectively, while blue and navy blue are WT and KI after CCH challenge. The SAN (sino atrial node) and cell numbers are the same than in Figure 3. \*\* $p < 0.01$  with respect to WT, ††  $P < 0.01$  and †††  $P < 0.001$  with respect to basal conditions.

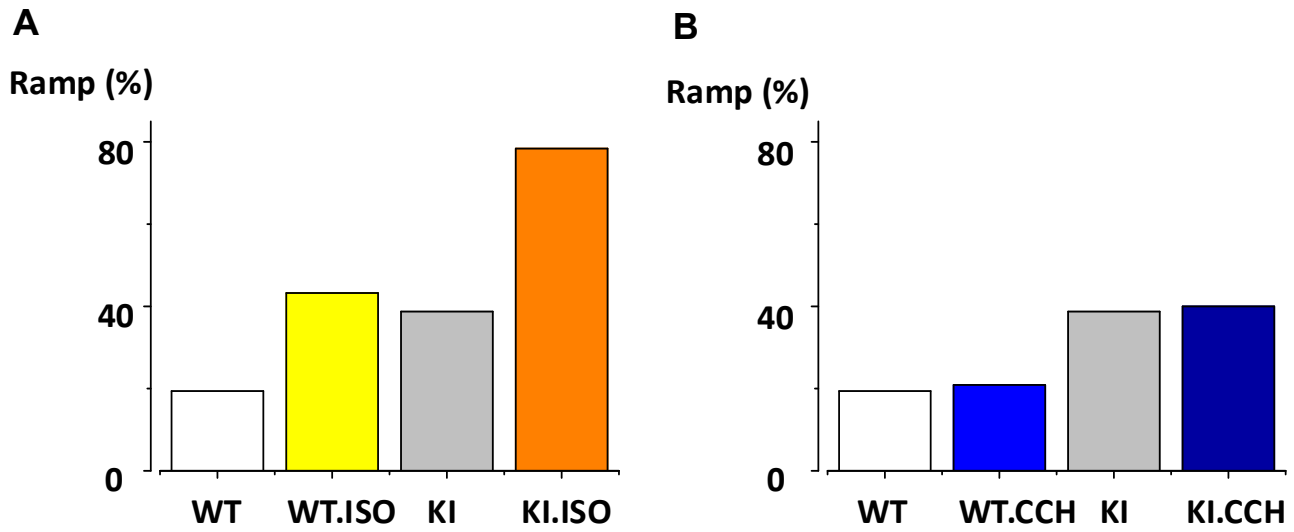

**Supp. Fig. 5. Ramp occurrence in the presence of isoproterenol (ISO) or carbachol (CCH).**

**A.** Ramp occurrence is increased by ISO application in both wild type (WT) and knock-in (KI) sinoatrial node cells. From 102 WT cells (15 mice) and 81 KI cells (14 mice) in basal condition, and 44 WT cells (7 mice) and 40 KI cells (6 mice) after ISO stimulation. **B.** Ramp occurrence is unchanged after CCH stimulation, from 102 WT cells (15 mice) and 81 KI cells (14 mice) in basal condition; 67 WT cells and 55 KI cells after CCH stimulation.

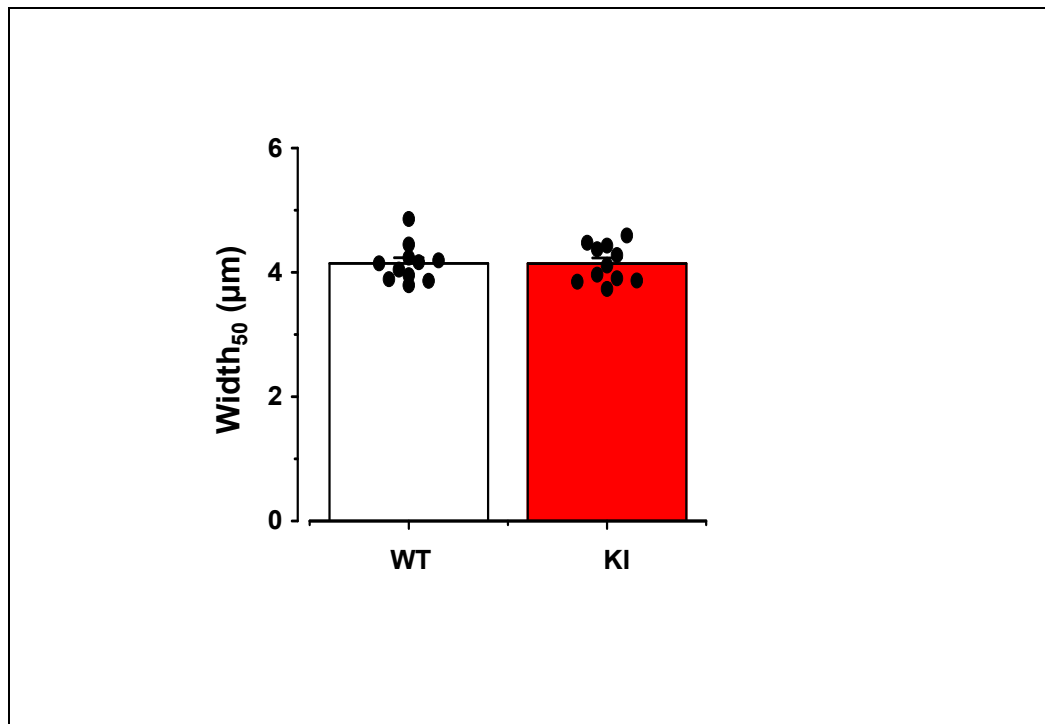

**Supp. Figure 6.  $\text{Ca}^{2+}$  spark width is unaltered in knock-in (KI) sinoatrial node cells compared to wild type (WT).** The  $\text{Width}_{50}$  was measured when the spark fluorescence trace is at 50% of maximum peak. Each point is the value for one sinoatrial node, n as in Figure 7.
